# Supplementary material
Source: PubMed Central journal article supplement (PMC7080402)
Supplement: NIHMS1574419-supplement-Supp_Material.pdf [file NIHMS1574419-supplement-Supp_Material.pdf]

# Compromised mitochondrial function in cortical bone osteocytes of long-lived growth hormone receptor null mice

Zhongbo Liu<sup>1</sup>, Maria de la Encarnacion Solesio<sup>1</sup>, Mitchell B Schaffler<sup>2</sup>, Dorra Frikha-Benayed<sup>2</sup>, Clifford J Rosen<sup>3</sup>, Haim Werner<sup>4</sup>, John J Kopchick<sup>5</sup>, Evgeny Pavlov<sup>1</sup>, Andrey Y Abramov<sup>6</sup>, and Shoshana Yakar<sup>1</sup>

## Supplementary information

### SUPPLEMENTARY FIGURES:

#### Supplementary Figure 1:

**Mitochondrial function in cortical osteocytes from bGH mice.** (A) Primary osteocytes from male mice were seeded ( $0.4 \times 10^6$  cells/ml) on collagen-coated glass plates and visualized using the 2000E Nikon Microscope Eclipse TE microscope at 60 $\times$  magnification. Osteocyte mitochondrial volume/cell volume was determined from 3-dimensional images of z-stack volumes reconstructed using the Amira FEI software. Live cells were labeled with Calcein AM and mitochondria were labeled with tetramethylrhodamine, ethyl ester (TMRE) (n=20 cells/genotype/age). Osteocyte MMP was calculated from peak tetramethylrhodamine, ethyl ester (TMRE) intensity (n=20 cells/genotype/age). Data are presented as mean $\pm$ SEM, and significance was accepted at p<0.05. (B)  $\Delta\Psi_m$  was estimated in vivo using MPM from the integrated intensity density of TMRM injected mice for >20 osteocytes per mouse. "Active mitochondrial fraction" was calculated from the volumetric density for >20 osteocytes per mouse. Data are presented as mean  $\pm$  SEM, and significance was accepted at p<0.05. (C) Protein levels of electron transport chain complexes (I-V) were determined from cell lysates of primary osteocytes by western immunoblotting using the Total OXPHOS cocktail. (D) Mitochondria-specific gene expression in primary osteocytes was determined using real-time polymerase chain reaction. (E) Cells were seeded ( $0.4 \times 10^6$  cells/ml) on collagen-coated glass plates and visualized using the 2000E Nikon Microscope Eclipse TE microscope at 20 $\times$  magnification. Time lapse of NADH autofluorescence in osteocytes from male bGH mice (insert; NADH redox index). (F) Mitochondrial respiration in primary osteocytes from 2-4 month-old (young) bGH mice. (G) Steady state ATP levels in primary osteocyte from 2-4 month-old bGH mice W/O rotenone. Data are presented as mean  $\pm$  SEM of triplicates in multiple assays. Significance was accepted at p<0.05.

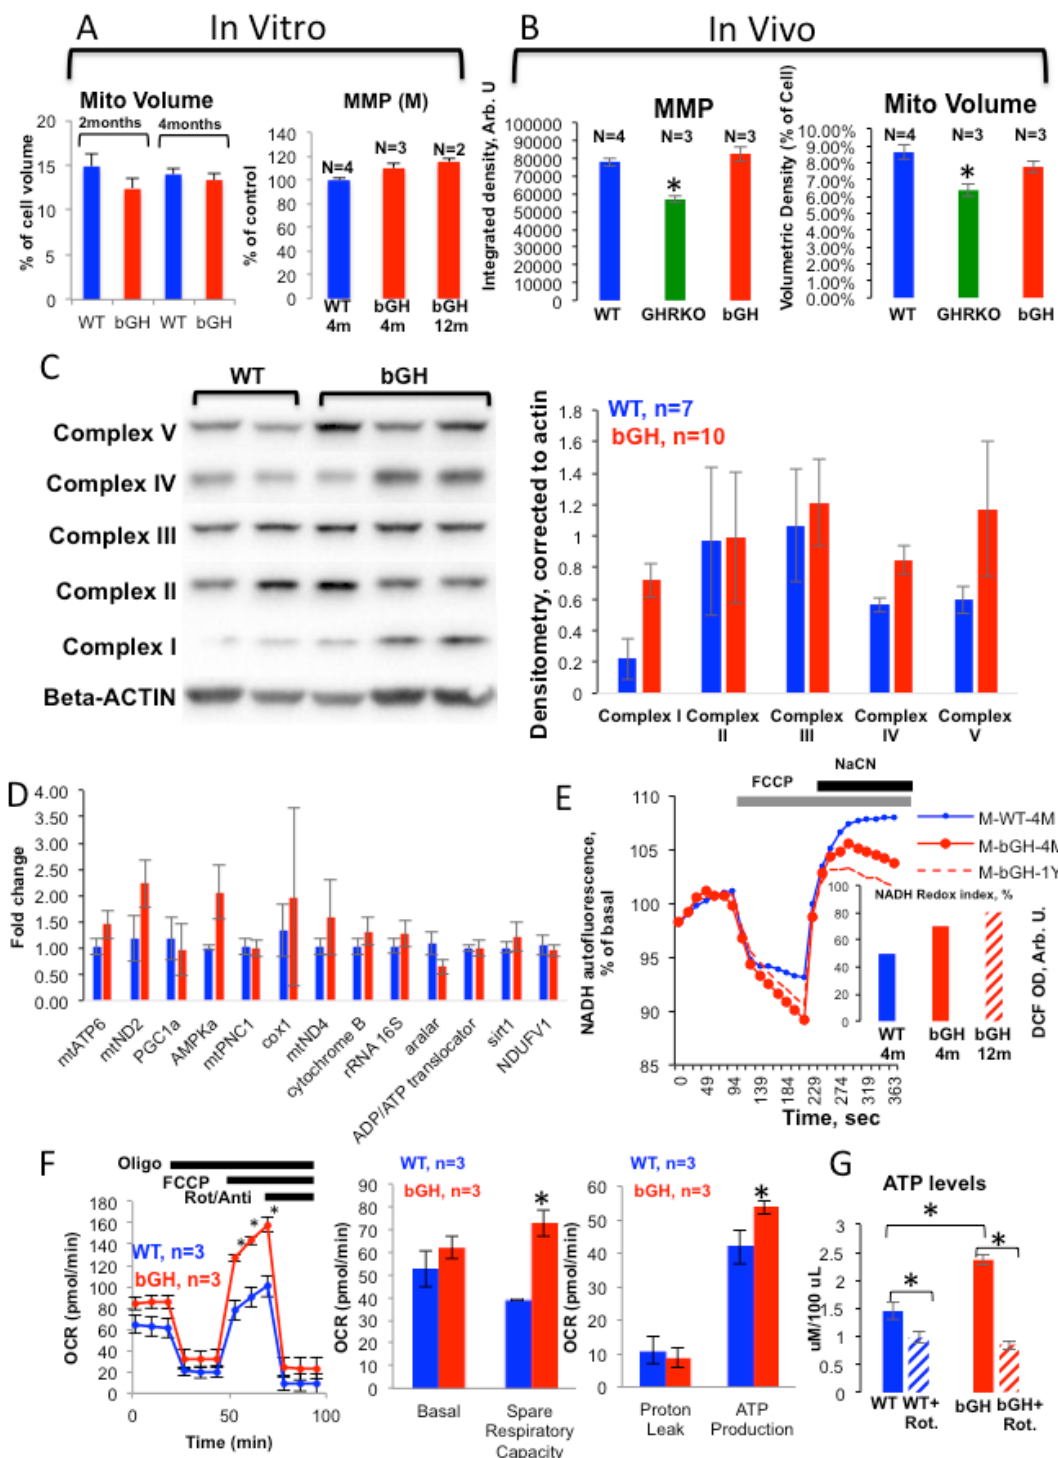

# Skin Fibroblasts

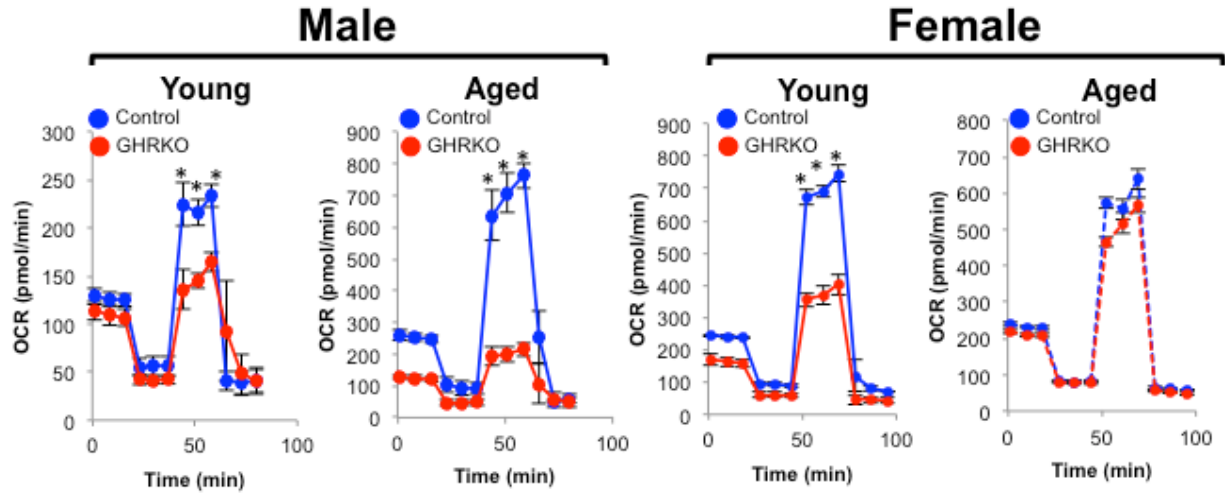

**Supplementary Figure 2: Mitochondrial respiration in primary fibroblast cultures from GHRKO and control mice.** Primary fibroblasts were seeded ( $0.4 \times 10^6$  cells/ml) in triplicate. Oxygen consumption rate (OCR) was determined at basal conditions and upon the addition of oligomycin ( $1 \mu\text{M}$ ), carbonyl cyanide 4-(trifluoromethoxy)phenylhydrazone (FCCP) ( $2 \mu\text{M}$ ), and rotenone/antimycin ( $0.5 \mu\text{M}$ ). Data were normalized to cell number determined at the end of the assay. Data were calculated according to the manufacturer's algorithm and presented as mean $\pm$ SEM of triplicate fibroblast cultures from 2-month-old (young) or 2-year-old (aged) male and female mice in multiple assays. Significance was accepted at  $p < 0.05$ .

**SUPPLEMENTARY TABLE 1:** Sequences of primers used for the quantitative polymerase chain reaction

| Gene name    | Forward (5' – 3')         | Reverse (5' – 3')         |
|--------------|---------------------------|---------------------------|
| DMP-1        | GAAGAGAGGACGGGTGATTTG     | CTGATGACTCACTGTTCGTGG     |
| MEPE         | GCCAGAGGGCCTCATGAAGAT     | CTTCATTCGGCATTGGTGCCG     |
| PHEX         | GCTCATGTAAGGTGCAATTCC     | GGCACCATTGACCCTAAATTG     |
| FGF23        | AGACCATCTACAGTGCCCTGA     | GGCTGAAGTGAAGCGATCCAA     |
| SOST         | GACGCCAAAGATGTGTCCGAG     | GTCTGTCAGGAAGCGGGTGTA     |
| COX1         | GGCATTGCACATCCATCCAC      | GCGCATGAGTACTTCTCGGA      |
| COX2         | TTCAAAAGAAAGTGCTGGAAGAGGT | GATCATCTCTACCTGAGTGTCTTT  |
| RANKL        | GCTCCGAGCTGGTGAAGAAA      | CCCCAAAGTACGTCGCATCT      |
| mt-ATP6      | AATTACAGGCTTCCGACACAAAC   | TGGAATTAGTGAAATTGGAGTTCT  |
| mt-PNC1      | TACAGGTCGTTCTGTGCAGAC     | TGTCATAAGCACGCTCTCC       |
| mt-ND2       | GGGCATGAGGAGGACTTAACCAAAC | TGAGGTTGAGTAGAGTGAGGGATGG |
| mt-ND4       | CAGACCCCCTATCCACACCA      | ATCCCTGCGTTTAGGCGTTC      |
| GP38         | AGATGGCTTGCCAGTAGTCAC     | GCTCTTTAGGGCGAGAACCTT     |
| rRNA 16S     | TGGGGTGACCTCGGAGAATAA     | GAAACCGACCTGGATTGCTC      |
| Cytochrome B | TGTTCCGAGTCATAGCCACA      | TGGGATGGCTGATAGGAGGT      |
| Aralar       | GAGGTGGACGGGGAGCATT       | CACCTCTCCATTTCGCTCT       |
| Sirt 1       | GTAATGTGAGGAGTCAGCAC      | TTGGACATTACCACGTCTGC      |
| ANT          | AGACTGCGTGGTTCGTATCC      | TGTCCACACCACCCAGAAAG      |
| Nrf2         | CTCAGCATGATGGACTTGGAG     | CACTTCTCGACTTACTCCAAGAT   |
| SOD          | CTGGCCAAGGGAGATGTTACA     | GTCACGCTTGATAGCCTCCAG     |
| Gpx          | GTGGTGCTCGGTTTCCCGTGC     | CCCGCCACCAGGTGCGACGTA     |
| Cat2         | GCTGAGAAGCCTAAGAACGC      | GTCTCCTCAGCGGAGGCTGA      |
| GLUT-1       | TGTGCTCATGACCATCGC        | AAGGCCACAAAGCCAAAGAT      |

**SUPPLEMENTARY TABLE 2: Antibodies**

| Antibody                        | Company (Cat. #)       | Dilution for western blot |
|---------------------------------|------------------------|---------------------------|
| Mito complex kit (total OXPHOS) | Abcam (ab110413)       | 1:250                     |
| LC3A/B                          | Cell Signaling (12741) | 1:1000                    |
| $\alpha$ -Tubulin               | Sigma (T6199)          | 1:5000                    |
| $\beta$ -Actin                  | Cell Signaling (4970)  | 1:2000                    |
| GLUT-1                          | Cell Signaling (12939) | 1:1000                    |
| GLUT-4                          | Biogenesis (4670-1704) | 1:750                     |
| AMPKa                           | Cell Signaling (5831)  | 1:1000                    |
| AMPKb1/2                        | Cell Signaling (4150)  | 1:1000                    |
| Phosphorylated AMPKa            | Cell Signaling (2535)  | 1:1000                    |
| Phosphorylated AMPKb            | Cell Signaling (4186)  | 1:1000                    |
| Cleaved caspase-3 (CC3)         | Cell Signaling (9664)  | 1:750                     |

**SUPPLEMENT METHOD:**

Primary skin fibroblast cultures: Two cm of a mouse tail was collected at sacrifice, washed 2 times with 70% ethanol and rinsed with PBS. Tails were then transferred to Petri dishes (Falcon, 35-1007), minced to <1mm with sterile scalpel and incubated with collagenase (400 U/ml, Cat# 17101-015, Gibco) in DMEM (Cat# 11965-092, Gibco) for 20-24 hours at 37 °C, 5% CO<sub>2</sub>. The collagenase suspension of the treated tails was passed through cell strainer cap (Cat#352235, Falcon, Corning, NY) to remove cell clumps and centrifuged 5 minutes at 200 g to collect cells. Cell pellets were resuspended in 3ml DMEM medium supplied with 10% FCS (Cat# 26140, ThermoFisher), plated on T75 flasks and incubated at 37 °C, 5% CO<sub>2</sub>.
